# Supplementary material
Source: PubMed Central journal article supplement (PMC5127284)

Supplementary Figure 1A : Dendritic Cells

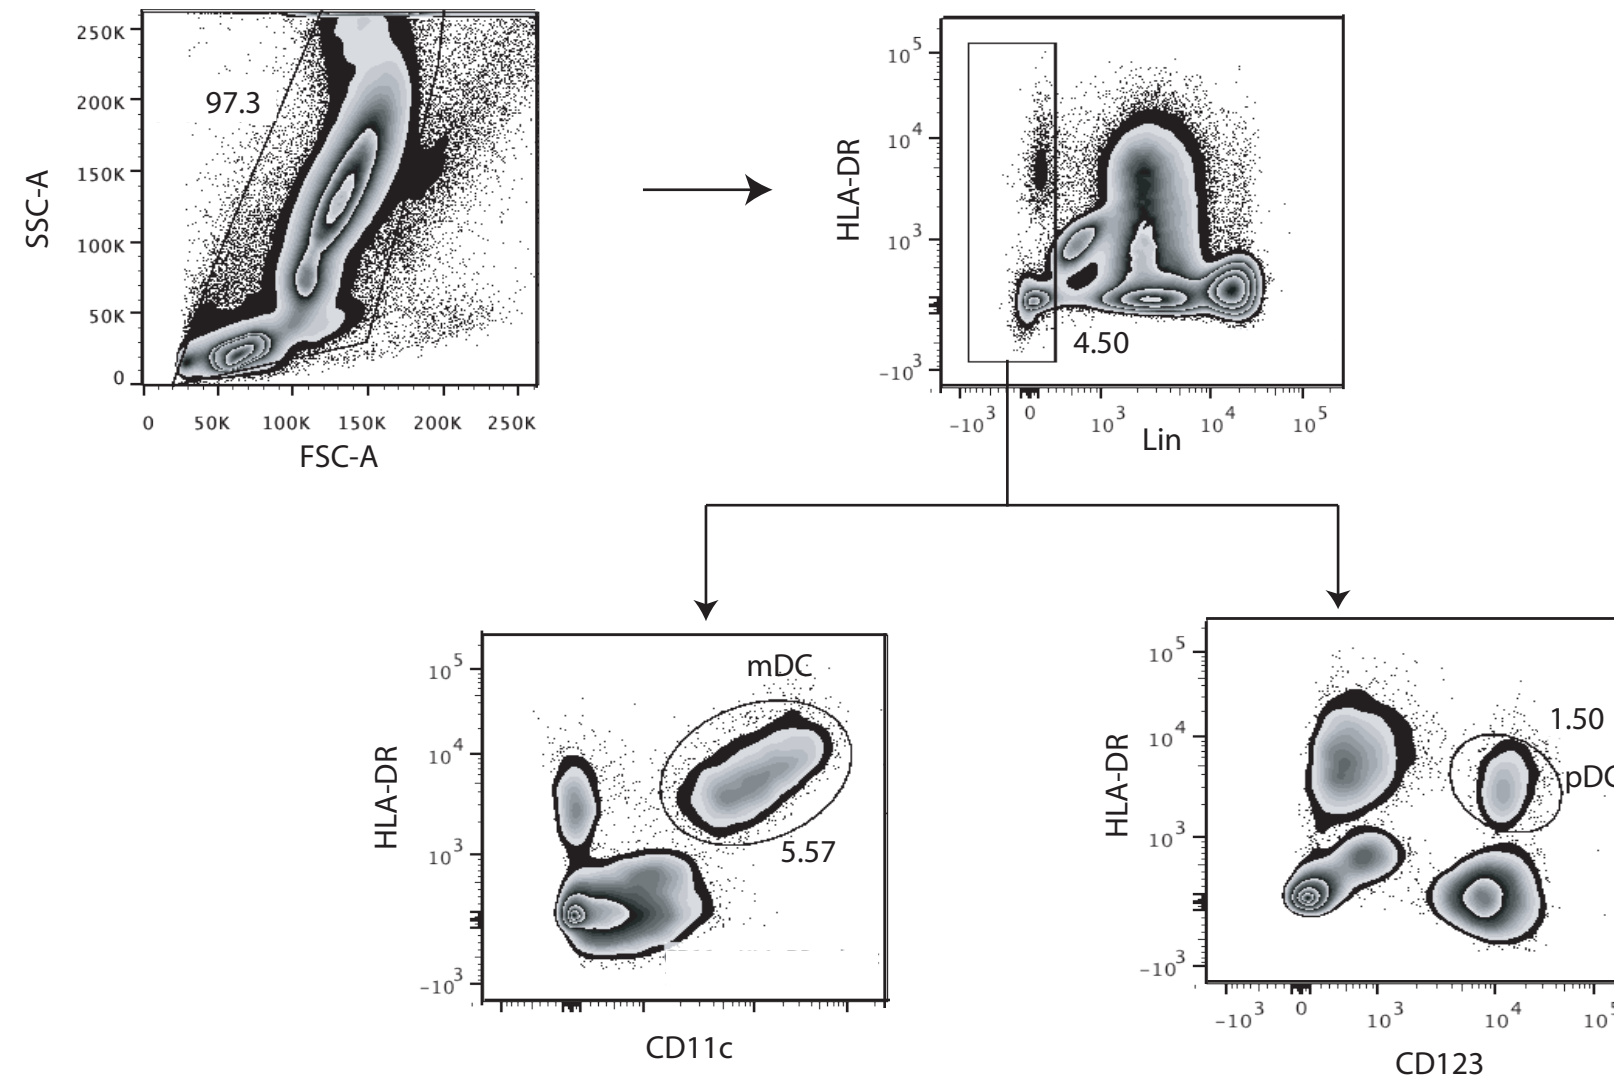

Supplementary Figure 1B : Monocyte

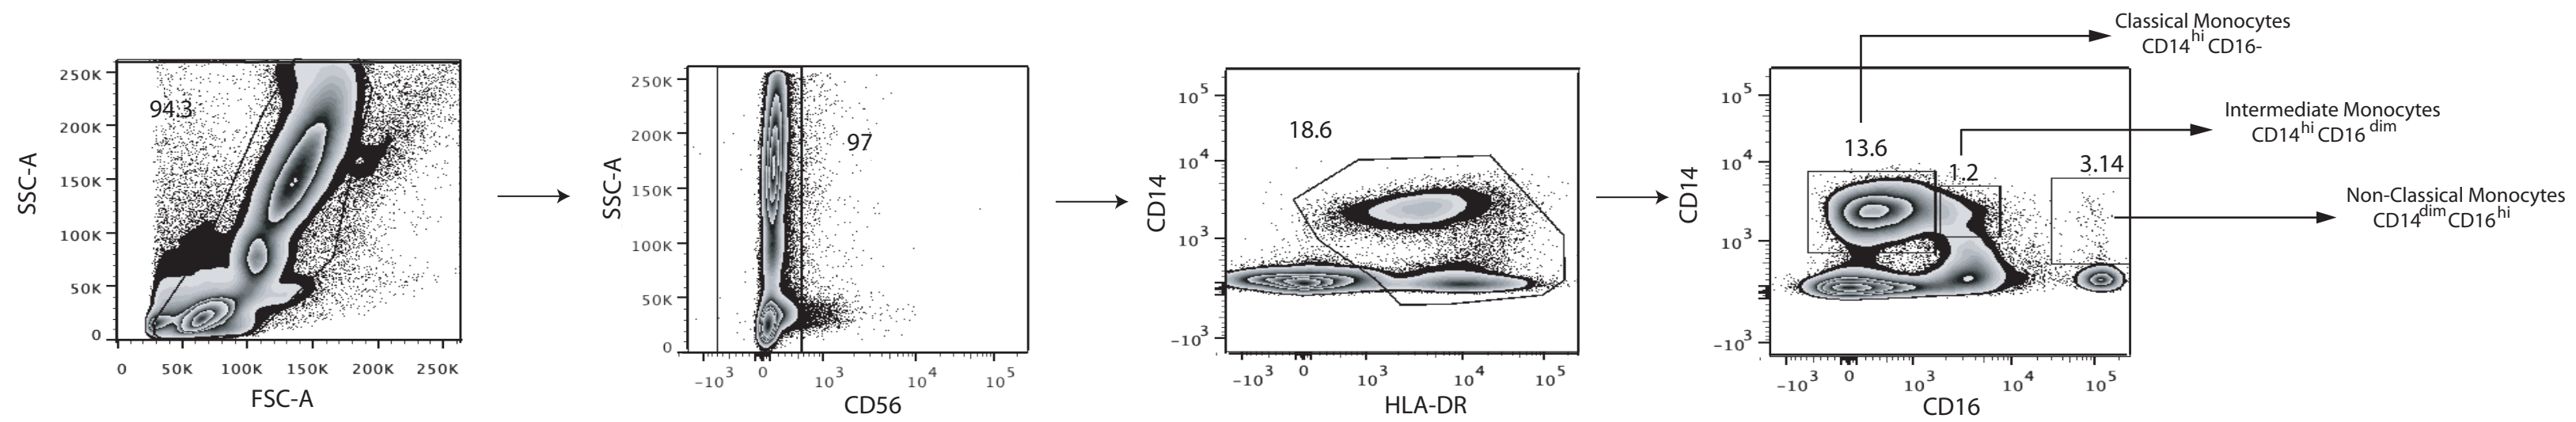

Supplement: NIHMS825716-supplement.pdf [file NIHMS825716-supplement.pdf]
